# Supplementary material for: Development of Genic and Genomic SSR Markers of Robusta Coffee (Coffea canephora Pierre Ex A. Froehner)
Source: PubMed Central journal article supplement (PMC4252042; doi:10.1371/journal.pone.0113661), 2014-12-02
Supplement: pone.0113661.s001.pdf [file pone.0113661.s001.pdf]

**Development of genic and genomic SSR markers of robusta coffee (*Coffea canephora* Pierre ex A. Froehner)**

Prasad S. Hendre, Ramesh K. Aggarwal

Centre for Cellular and Molecular Biology (CSIR-CCMB), Uppal Road, Hyderabad- 500 007, Telangana, India

Table S1: Summary statistics of screening of the coffee unigene ESTs for SSRs

|                                                                         |                                 |
|-------------------------------------------------------------------------|---------------------------------|
| Total number of unigene ESTs analysed (X)                               | 13,175                          |
| Total length of unigene ESTs analyzed (Kb)                              | 8,922.8                         |
| Average size of unigene EST (bases)                                     | 677.3                           |
| Total number of SSRs identified (EST-SSRs; Y)                           | 2,589                           |
| Total number of unigene ESTs containing SSRs (SSR-ESTs)                 | 2,028 (15.4% of X)              |
| Number of unigenes containing > 1 SSR core                              | 405 (3.1% of X)                 |
| Number of unigenes containing compound SSRs                             | 217 (1.6% of X)                 |
| Total number of 'usable' SSRs <sup>u*</sup> (A)                         | 483 (18.7% of Y)                |
| Total number of unigenes containing usable SSRs                         | 457 (3.5% of X)                 |
| Number of unigenes containing > 1 usable SSR core                       | 24 (0.2% of X)                  |
| Number of unigenes containing usable compound SSRs                      | 10 (<0.1% of X)                 |
| Number of SSRs found suitable for primer designing (B)                  | 318 (12.3% of Y;<br>65.8% of A) |
| Number of primer pairs used for validation studies                      | 50 (15.7% of B)                 |
| Number of working primer pairs of the tested pairs                      | 44 (13.8% of B)                 |
| Number and average spacing (in Kb) between identified SSRs <sup>+</sup> | 2589, 3.4                       |
| <i>DNRs</i>                                                             | 502, 17.7                       |
| <i>TNRs</i>                                                             | 1285, 6.9                       |
| <i>TtNRs</i>                                                            | 503, 17.7                       |
| Number and average spacing (in Kb) between usable SSRs <sup>+</sup>     | 483, 15.9                       |
| <i>DNRs</i>                                                             | 201, 32.2                       |
| <i>TNRs</i>                                                             | 195, 45.6                       |
| <i>TtNRs</i>                                                            | 26, 342.3                       |

\*: SSRs having a repeat core of minimum 18 bp; <sup>+</sup>: The calculations include DNRs, TNRs, TtNRs, as well as PNRs, and other HNRs.
