# Supplementary material for: Development of Genic and Genomic SSR Markers of Robusta Coffee (Coffea canephora Pierre Ex A. Froehner)
Source: PubMed Central journal article supplement (PMC4252042; doi:10.1371/journal.pone.0113661), 2014-12-02
Supplement: pone.0113661.s002.pdf [file pone.0113661.s002.pdf]

**Development of genic and genomic SSR markers of robusta coffee (*Coffea canephora* Pierre ex A. Froehner)**

Prasad S. Hendre, Ramesh K. Aggarwal

Centre for Cellular and Molecular Biology (CSIR-CCMB), Uppal Road, Hyderabad- 500 007, Telangana, India

**Table S2: Summary statistics of distribution and abundance of detected SSRs in the unigene ESTs and SSR frequency estimates for coffee transcriptome**

| SSR motif           | No.s of SSRs detected (% of total SSRs) |                                 |                                                                                  | Mean no. of repeats/SSR <sub>d</sub><br>(Range of repeat iterations in the SSR core) | Estimated number and spacing of definable SSRs in the analyzed coffee transcriptome (a= 8.9 Mb) |                                                                                        | Estimated number and spacing of usable SSRs in the analyzed coffee transcriptome (a= 8.9 Mb) |                                                                                        |
|---------------------|-----------------------------------------|---------------------------------|----------------------------------------------------------------------------------|--------------------------------------------------------------------------------------|-------------------------------------------------------------------------------------------------|----------------------------------------------------------------------------------------|----------------------------------------------------------------------------------------------|----------------------------------------------------------------------------------------|
|                     | Definable SSRs (SSR <sup>d</sup> )      | Usable SSRs (SSR <sup>u</sup> ) | Proportion of usable versus definable SSRs (SSR <sup>u</sup> /SSR <sup>d</sup> ) |                                                                                      | No. of SSRs <sup>d</sup> /Mb transcriptome (X <sup>d</sup> = SSR <sup>d</sup> /a)               | SSR <sup>d</sup> spacing in transcriptome (Kb) (Z <sup>d</sup> = 1000/X <sup>d</sup> ) | No. of SSRs <sup>u</sup> /Mb transcriptome (X <sup>u</sup> = SSR <sup>u</sup> /a)            | SSR <sup>u</sup> spacing in transcriptome (Kb) (Z <sup>u</sup> = 1000/X <sup>u</sup> ) |
| <b><i>DNRs</i></b>  |                                         |                                 |                                                                                  |                                                                                      |                                                                                                 |                                                                                        |                                                                                              |                                                                                        |
| AG                  | 295 (11.4%)                             | 140 (29.0%)                     | 0.47                                                                             | 8.6 (6 to 21)                                                                        | 33.1                                                                                            | 30.2                                                                                   | 19.3                                                                                         | 51.7                                                                                   |
| AT                  | 123 (4.8%)                              | 36 (7.5%)                       | 0.29                                                                             | 8.3 (6 to 23)                                                                        | 13.8                                                                                            | 72.4                                                                                   | 7.2                                                                                          | 139.1                                                                                  |
| AC                  | 80 (3.1%)                               | 25 (5.2%)                       | 0.31                                                                             | 10.5 (6 to 36)                                                                       | 9.0                                                                                             | 111.3                                                                                  | 4.5                                                                                          | 222.5                                                                                  |
| CG                  | 4 (0.2%)                                | --                              | --                                                                               | 6.3 (6 to 7)                                                                         | 0.4                                                                                             | 2225.0                                                                                 | --                                                                                           | --                                                                                     |
| <b>All DNRs</b>     | <b>502 (14.6%)</b>                      | <b>201 (41.6%)</b>              | <b>0.40</b>                                                                      | <b>9.6 (6 to 36)</b>                                                                 | <b>56.4</b>                                                                                     | <b>17.7</b>                                                                            | <b>31.0</b>                                                                                  | <b>32.2</b>                                                                            |
| <b><i>TNRs</i></b>  |                                         |                                 |                                                                                  |                                                                                      |                                                                                                 |                                                                                        |                                                                                              |                                                                                        |
| AAG                 | 282 (10.9%)                             | 55 (11.4%)                      | 0.20                                                                             | 4.8 (4 to 11)                                                                        | 31.7                                                                                            | 31.6                                                                                   | 6.2                                                                                          | 161.8                                                                                  |
| ACC                 | 183(7.1%)                               | 16 (3.3%)                       | 0.09                                                                             | 4.5 (4 to 10)                                                                        | 20.6                                                                                            | 48.6                                                                                   | 1.8                                                                                          | 556.3                                                                                  |
| AGG                 | 174 (6.7%)                              | 31 (6.4%)                       | 0.18                                                                             | 4.6 (4 to 8)                                                                         | 19.6                                                                                            | 51.1                                                                                   | 3.5                                                                                          | 287.1                                                                                  |
| ACT                 | 136 (5.3%)                              | 6 (1.2%)                        | 0.04                                                                             | 4.3 (4 to 9)                                                                         | 15.3                                                                                            | 65.4                                                                                   | 0.7                                                                                          | 1483.3                                                                                 |
| AGC                 | 120 (4.6%)                              | 23 (4.8%)                       | 0.19                                                                             | 4.8 (4 to 9)                                                                         | 13.5                                                                                            | 74.2                                                                                   | 2.6                                                                                          | 387.0                                                                                  |
| ACG                 | 104 (4.0%)                              | 14 (2.9%)                       | 0.13                                                                             | 4.5 (4 to 8)                                                                         | 11.7                                                                                            | 85.6                                                                                   | 1.6                                                                                          | 635.7                                                                                  |
| AGT                 | 102 (3.9%)                              | 17 (3.5%)                       | 0.17                                                                             | 4.6 (4 to 9)                                                                         | 11.5                                                                                            | 87.3                                                                                   | 1.9                                                                                          | 523.5                                                                                  |
| AAT                 | 87 (3.4%)                               | 14 (2.9%)                       | 0.16                                                                             | 4.6 (4 to 12)                                                                        | 9.8                                                                                             | 102.3                                                                                  | 1.6                                                                                          | 635.7                                                                                  |
| CCG                 | 54 (2.1%)                               | 9 (1.9%)                        | 0.17                                                                             | 4.6 (4 to 8)                                                                         | 6.1                                                                                             | 164.8                                                                                  | 1.0                                                                                          | 988.9                                                                                  |
| AAC                 | 43 (1.7%)                               | 10 (2.1%)                       | 0.23                                                                             | 4.6 (4 to 8)                                                                         | 4.8                                                                                             | 207.0                                                                                  | 1.1                                                                                          | 890.0                                                                                  |
| <b>All TNRs</b>     | <b>1285 (49.6%)</b>                     | <b>195 (40.4%)</b>              | <b>0.15</b>                                                                      | <b>4.6 (4 to 12)</b>                                                                 | <b>144.4</b>                                                                                    | <b>6.9</b>                                                                             | <b>21.9</b>                                                                                  | <b>45.6</b>                                                                            |
| <b><i>TtNRs</i></b> |                                         |                                 |                                                                                  |                                                                                      |                                                                                                 |                                                                                        |                                                                                              |                                                                                        |
| AAAG                | 103                                     | 4 (0.8%)                        | 0.04                                                                             | 3.2 (3 to 6)                                                                         | 11.6                                                                                            | 86.4                                                                                   | 0.4                                                                                          | 2225.0                                                                                 |

|                       |                        |                  |             |                      |              |             |             |              |
|-----------------------|------------------------|------------------|-------------|----------------------|--------------|-------------|-------------|--------------|
|                       | (4.0%)                 |                  |             |                      |              |             |             |              |
| AAAT                  | 77 (3.0%)              | 4 (0.8%)         | 0.05        | 3.3 (3 to 6)         | 8.7          | 115.6       | 0.4         | 2225.0       |
| AAAC                  | 35 (1.4%)              | 1 (0.2%)         | 0.03        | 3.1 (3 to 5)         | 3.9          | 254.3       | 0.1         | 8900.0       |
| AAGG                  | 31 (1.2%)              | 3 (0.6%)         | 0.10        | 3.4 (3 to 8)         | 3.5          | 287.1       | 0.3         | 2966.7       |
| AAGT                  | 23 (0.9%)              | 5 (1.0%)         | 0.22        | 3.7 (3 to 6)         | 2.6          | 387.0       | 0.6         | 1780.0       |
| AACT                  | 22 (0.8%)              | 1 (0.2%)         | 0.05        | 3.2 (3 to 5)         | 2.5          | 404.5       | 0.1         | 8900.0       |
| ACAT                  | 20 (0.8%)              | 2 (0.4%)         | 0.10        | 3.3 (3 to 5)         | 2.2          | 445.0       | 0.2         | 4450.0       |
| AGGG                  | 19 (0.7%)              | 2 (0.4%)         | 0.11        | 3.3 (3 to 5)         | 2.1          | 468.4       | 0.2         | 4450.0       |
| AATC                  | 15 (0.6%)              | --               | --          | 3.2 (3 to 4)         | 1.7          | 593.3       | --          | --           |
| AAGC                  | 14 (0.5%)              | 2 (0.4%)         | 0.14        | 3.4 (3 to 7)         | 1.6          | 635.7       | 0.2         | 4450.0       |
| AGGT                  | 14 (0.5%)              | 1 (0.2%)         | 0.07        | 3.1 (3 to 5)         | 1.6          | 635.7       | 0.1         | 8900.0       |
| AACC                  | 13 (0.5%)              | --               | --          | 3                    | 1.5          | 684.6       | --          | --           |
| AATT                  | 13 (0.5%)              | --               | --          | 3                    | 1.5          | 684.6       | --          | --           |
| AGAT                  | 12 (0.5%)              | --               | --          | 3.1 (3 to 4)         | 1.3          | 741.7       | --          | --           |
| ACGT                  | 10 (0.5%)              | 1 (0.2%)         | 0.10        | 3.1 (3 to 5)         | 1.1          | 890.0       | 0.1         | 8900.0       |
| AACG                  | 10 (0.4%)              | --               | --          | 3.1 (3 to 4)         | 1.1          | 890.0       | --          | --           |
| AATG                  | 10 (0.4%)              | --               | --          | 3.3 (3 to 4)         | 1.1          | 890.0       | --          | --           |
| AGCT                  | 10 (0.4%)              | --               | --          | 3.2 (3 to 4)         | 1.1          | 890.0       | --          | --           |
| ACCT                  | 8 (0.3%)               | --               | --          | 3                    | 0.9          | 1112.5      | --          | --           |
| ACTC                  | 8 (0.3%)               | --               | --          | 3.1 (3 to 4)         | 0.9          | 1112.5      | --          | --           |
| ACAG                  | 7 (0.3%)               | --               | --          | 3.1 (3 to 4)         | 0.8          | 1271.4      | --          | --           |
| ACCC                  | 6 (0.2%)               | --               | --          | 3.2 (3 to 4)         | 0.7          | 1483.3      | --          | --           |
| AGGC                  | 5 (0.2%)               | --               | --          | 3.2 (3 to 4)         | 0.6          | 1780.0      | --          | --           |
| ACCG                  | 4 (0.2%)               | --               | --          | 3                    | 0.4          | 2225.0      | --          | --           |
| ACGC                  | 3 (0.1%)               | --               | --          | 3                    | 0.3          | 2966.7      | --          | --           |
| AGCC                  | 3 (0.1%)               | --               | --          | 3.7 (3 to 4)         | 0.3          | 2966.7      | --          | --           |
| CCCG                  | 3 (0.1%)               | --               | --          | 3                    | 0.3          | 2966.7      | --          | --           |
| ACTG                  | 2 (0.1%)               | --               | --          | 3                    | 0.2          | 4450.0      | --          | --           |
| AGCG                  | 2 (0.1%)               | --               | --          | 3                    | 0.2          | 4450.0      | --          | --           |
| AGTC                  | 1 (<0.1%)              | --               | --          | 3                    | 0.1          | 8900.0      | --          | --           |
| <b>All<br/>TtNRs</b>  | <b>503<br/>(19.4%)</b> | <b>26 (5.4%)</b> | <b>0.05</b> | <b>3.2 (3 to 8)</b>  | <b>56.5</b>  | <b>17.7</b> | <b>2.9</b>  | <b>342.3</b> |
| <b>All<br/>PNRs</b>   | <b>144<br/>(5.6%)</b>  | <b>26 (5.4%)</b> | <b>0.18</b> | <b>3.2 (3 to 5)</b>  | <b>16.2</b>  | <b>61.8</b> | <b>2.9</b>  | <b>342.3</b> |
| <b>All<br/>HNRs</b>   | <b>155<br/>(6.0%)</b>  | <b>35 (7.2%)</b> | <b>0.23</b> | <b>3.3 (3 to 6)</b>  | <b>17.4</b>  | <b>57.4</b> | <b>3.9</b>  | <b>254.3</b> |
| <b>Total<br/>SSRs</b> | <b>2589</b>            | <b>483</b>       | <b>0.19</b> | <b>5.2 (3 to 36)</b> | <b>290.9</b> | <b>3.4</b>  | <b>62.7</b> | <b>15.9</b>  |

Note: SSR<sup>d</sup>: definable SSRs; SSR<sup>u</sup>: usable SSRs; --: Not detected
