# Supplementary material for: Development of Genic and Genomic SSR Markers of Robusta Coffee (Coffea canephora Pierre Ex A. Froehner)
Source: PubMed Central journal article supplement (PMC4252042; doi:10.1371/journal.pone.0113661), 2014-12-02
Supplement: pone.0113661.s003.pdf [file pone.0113661.s003.pdf]

**Development of genic and genomic SSR markers of robusta coffee (*Coffea canephora* Pierre ex A. Froehner)**

Prasad S. Hendre, Ramesh K. Aggarwal

Centre for Cellular and Molecular Biology (CSIR-CCMB), Uppal Road, Hyderabad- 500 007, Telangana, India

Table S3: Characteristics and distribution of the detected SSR motifs (without MNRs) across the non-redundant 56 SSR+ive sequences generated using SSR enrichment approach.

| <i>SSR motif type/<br/>length</i> | <i>AG<sup>T</sup></i> | <i>AC<sup>T</sup></i> | <i>AT<sup>NT</sup></i> | <i>DNRs</i> | <i>AAC<sup>T</sup></i> | <i>AAG<sup>T</sup></i> | <i>TNRs<sup>T</sup></i> | <i>All detected<br/>SSRs (without<br/>MNRs)</i> |
|-----------------------------------|-----------------------|-----------------------|------------------------|-------------|------------------------|------------------------|-------------------------|-------------------------------------------------|
| 6 to 7-mer                        | 5                     | 4                     | 1                      | 10          | 1                      | 1                      | 2                       | 12                                              |
| 8 to 10-mer                       | 11                    | 8                     | 1                      | 20          | 1                      | --                     | 1                       | 21                                              |
| 11 to 13-mer                      | 6                     | 5                     | --                     | 11          | --                     | --                     | --                      | 11                                              |
| 14 to 16-mer                      | 3                     | 3                     | --                     | 6           | --                     | --                     | --                      | 6                                               |
| 17 to 19-mer                      | 2                     | 1                     | --                     | 3           | --                     | --                     | --                      | 3                                               |
| 20 to 22-mer                      | 3                     | 2                     | --                     | 5           | --                     | --                     | --                      | 5                                               |
| 23 to 25-mer                      | 7                     | 0                     | --                     | 7           | --                     | --                     | --                      | 7                                               |
| 26 to 28-mer                      | 3                     | 1                     | --                     | 4           | --                     | --                     | --                      | 4                                               |
| 29 to 31-mer                      | 1                     | 0                     | --                     | 1           | --                     | --                     | --                      | 1                                               |
| Total number                      | 41                    | 24                    | 2                      | 67          | 2                      | 1                      | 3                       | 70                                              |
| Total length (RIs)                | 632                   | 298                   | 14                     | 944         | 16                     | 6                      | 22                      | 966                                             |
| Mean length (RIs)                 | 15.4                  | 12.4                  | 7                      | 14.2        | 8                      | 6                      | 7.3                     | 13.8                                            |

Note: <sup>T</sup>: Targeted SSR motifs; <sup>NT</sup>: Non-targeted SSR motifs; --: Not detected; RI: Repeat Iterations
