# Supplementary material for: Development of Genic and Genomic SSR Markers of Robusta Coffee (Coffea canephora Pierre Ex A. Froehner)
Source: PubMed Central journal article supplement (PMC4252042; doi:10.1371/journal.pone.0113661), 2014-12-02
Supplement: pone.0113661.s004.pdf [file pone.0113661.s004.pdf]

**Development of genic and genomic SSR markers of robusta coffee (*Coffea canephora* Pierre ex A. Froehner)**

Prasad S. Hendre, Ramesh K. Aggarwal, Centre for Cellular and Molecular Biology (CSIR-CCMB), Uppal Road, Hyderabad- 500 007, Telangana, India

**Table S4: Inter-species and inter-generic transferability of the new EST-SSRs and genomic SSR markers**

| Species                                                                                                                  | <i>Coffea</i> spp. |                     |                    |                        |                    |                    |                      |                    |                       |                   |                    |                    |                                      |                      |                         | <i>Psilanthus</i> spp.                   |                                      |                      | Average Average $C_{taxa}$ for all coffees |                                          |                                           |
|--------------------------------------------------------------------------------------------------------------------------|--------------------|---------------------|--------------------|------------------------|--------------------|--------------------|----------------------|--------------------|-----------------------|-------------------|--------------------|--------------------|--------------------------------------|----------------------|-------------------------|------------------------------------------|--------------------------------------|----------------------|--------------------------------------------|------------------------------------------|-------------------------------------------|
|                                                                                                                          | Erythrocoffea      |                     | Mozamicroffea      |                        |                    |                    | Melanocoffea         | Pachycoffea        |                       |                   |                    |                    | Average $C_{taxa}$ ( <i>Coffea</i> ) | Paracoffea           |                         | Average $C_{taxa}$ ( <i>Psilanthus</i> ) |                                      |                      |                                            |                                          |                                           |
| Primer name                                                                                                              | <i>C. arabica</i>  | <i>C. congensis</i> | Average $C_{taxa}$ | <i>C. eugeniooides</i> | <i>C. kapakata</i> | <i>C. racemosa</i> | <i>C. salavatrix</i> | Average $C_{taxa}$ | <i>C. stenophylla</i> | <i>C. excelsa</i> | <i>C. litorica</i> | <i>C. aeokatae</i> | <i>C. deweyrei</i>                   | <i>C. arnoldiana</i> | <i>C. ariawemiensis</i> | Average $C_{taxa}$                       | Average $C_{taxa}$ ( <i>Coffea</i> ) | <i>P. engatensis</i> | <i>P. wightiana</i>                        | Average $C_{taxa}$ ( <i>Psilanthus</i> ) |                                           |
| a. EST-SSRs ( <i>in-silico</i> EST database)                                                                             |                    |                     |                    |                        |                    |                    |                      |                    |                       |                   |                    |                    |                                      |                      |                         |                                          |                                      |                      |                                            |                                          |                                           |
| <b>All the CCESSRs</b>                                                                                                   | 1.00               | 1.00                | 1.00               | 1.00                   | 1.00               | 1.00               | 1.00                 | 1.00               | 1.00                  | 1.00              | 1.00               | 1.00               | 1.00                                 | 1.00                 | 1.00                    | 1.00                                     | 1.00                                 | 1.00                 | 1.00                                       | 1.00                                     | $1.00(C_{taxa-mark})/1.00(C_{mark-taxa})$ |
| b. genomic-SSRs (SSR enrichment approach)                                                                                |                    |                     |                    |                        |                    |                    |                      |                    |                       |                   |                    |                    |                                      |                      |                         |                                          |                                      |                      |                                            |                                          |                                           |
| CCRM06, CCRM14, CCRM16, CCRM17, CCRM19, CCRM21, CCRM23, CCRM24, CCRM28, CCRM31, CCRM33 to CCRM38, CCRM40, CCRM42, CCRM45 | +                  | +                   | 1.00               | +                      | +                  | +                  | +                    | 1.00               | +                     | +                 | +                  | +                  | +                                    | +                    | +                       | 1.00                                     | 1.00                                 | +                    | +                                          | 1.00                                     | 1.00                                      |
| CCRM02                                                                                                                   | +                  | +                   | 1.00               | +                      | +                  | +                  | +                    | 1.00               | +                     | +                 | +                  | +                  | +                                    | -                    | +                       | 0.83                                     | 0.85                                 | +                    | +                                          | 1.00                                     | 0.87                                      |
| CCRM07                                                                                                                   | +                  | -                   | 0.50               | +                      | +                  | +                  | +                    | 1.00               | +                     | +                 | +                  | +                  | +                                    | -                    | +                       | 0.83                                     | 0.77                                 | +                    | +                                          | 1.00                                     | 0.80                                      |
| CCRM10                                                                                                                   | +                  | +                   | 1.00               | +                      | +                  | +                  | +                    | 1.00               | +                     | +                 | +                  | +                  | +                                    | +                    | +                       | 1.00                                     | 0.92                                 | -                    | -                                          | 0.00                                     | 0.80                                      |
| CCRM15                                                                                                                   | +                  | +                   | 1.00               | -                      | +                  | -                  | +                    | 0.50               | -                     | -                 | +                  | +                  | +                                    | +                    | -                       | 0.67                                     | 0.69                                 | -                    | -                                          | 0.00                                     | 0.60                                      |
| CCRM22                                                                                                                   | +                  | +                   | 1.00               | +                      | +                  | +                  | -                    | 0.75               | +                     | +                 | +                  | +                  | +                                    | +                    | -                       | 0.83                                     | 0.77                                 | +                    | +                                          | 1.00                                     | 0.80                                      |
| CCRM41                                                                                                                   | +                  | +                   | 1.00               | +                      | -                  | +                  | +                    | 0.75               | -                     | +                 | +                  | -                  | +                                    | +                    | +                       | 0.83                                     | 0.85                                 | +                    | +                                          | 1.00                                     | 0.87                                      |
| <b>Average <math>T_{mark}</math></b>                                                                                     | 1.00               | 0.96                | 0.98               | 0.96                   | 0.96               | 0.96               | 0.96                 | 0.96               | 0.92                  | 0.96              | 1.00               | 0.96               | 1.00                                 | 0.92                 | 0.92                    | 0.96                                     | 0.96                                 | 0.92                 | 0.92                                       | 0.92                                     | $0.95(C_{taxa-mark})/0.94(C_{mark-taxa})$ |

+/-: Indicates 'amplification'/'No amplification' and are given a weightage of 1 and 0 for transferability/conservation calculations respectively;  $T_{mark}$ : Marker transferability over all the taxa;  $C_{taxa}$ : Marker conservation over all the taxa;  $T_{mark-taxa}$ : Marker transferability of all the markers over all the taxa;  $C_{taxa-mark}$ : Primer conservation across all the taxa over all the markers.
